# Supplementary material for: Association Between Cardiorespiratory Fitness and Cancer Incidence and Cancer-Specific Mortality of Colon, Lung, and Prostate Cancer Among Swedish Men
Source: PubMed Central journal article supplement (PMC10311389; doi:10.1001/jamanetworkopen.2023.21102), 2023-06-29
Supplement: jamanetwopen-e2321102-s001.pdf [file jamanetwopen-e2321102-s001.pdf]

## Supplementary Online Content

Ekblom-Bak E, Bojsen-Møller E, Wallin P, et al. Association between cardiorespiratory fitness and cancer incidence and cancer-specific mortality of colon, lung, and prostate cancer among Swedish men. *JAMA Netw Open*. 2023;6(6):e2321102. doi:10.1001/jamanetworkopen.2023.21102

**eFigure 1.** Working Model of Possible Causal Pathways Leading to Cancer in Men

**eFigure 2.** Flow Chart of Included and Excluded Participants

**eFigure 3.** Cumulative Colon Cancer Incidence and Survival in Relation to Cardiorespiratory (CRF) Group

**eFigure 4.** Cumulative Lung Cancer Incidence and Survival in Relation to Cardiorespiratory (CRF) Group

**eFigure 5.** Cumulative Prostate Cancer Incidence and Survival in Relation to Cardiorespiratory (CRF) Group

This supplementary material has been provided by the authors to give readers additional information about their work.

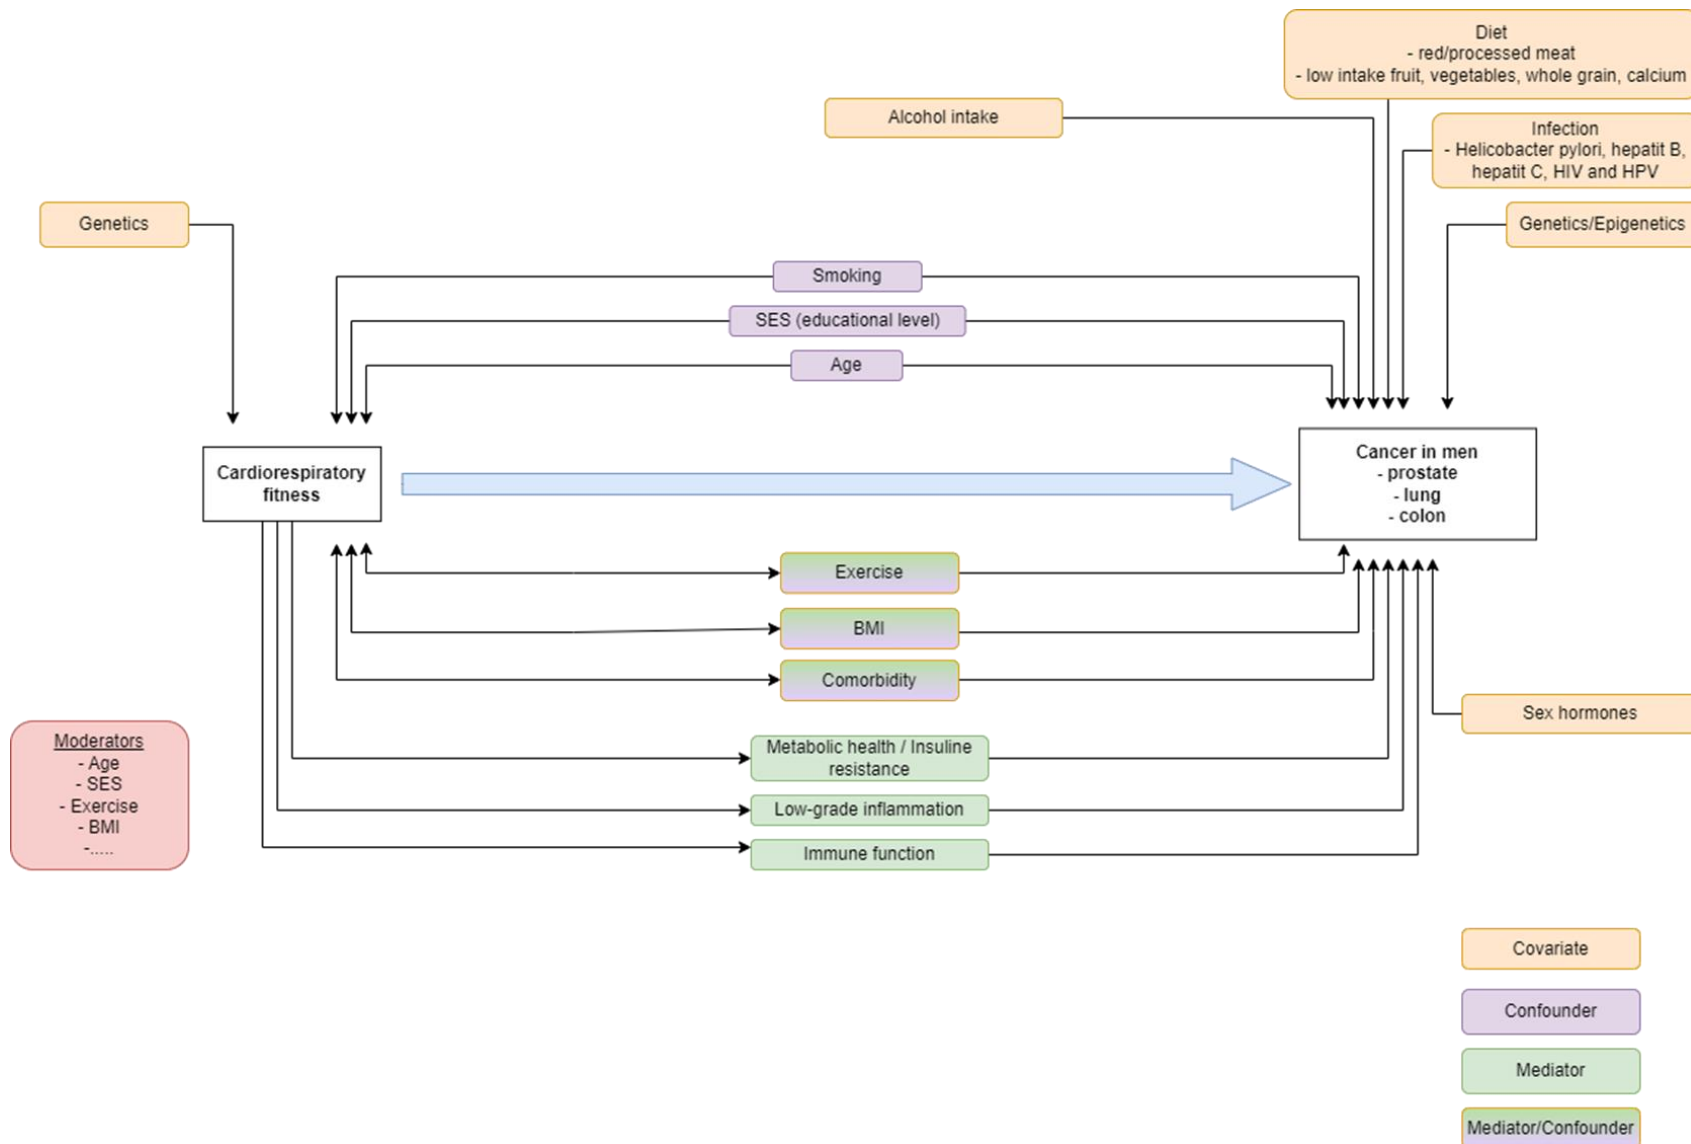

eFigure 1. Working model of possible causal pathways leading to cancer in men.

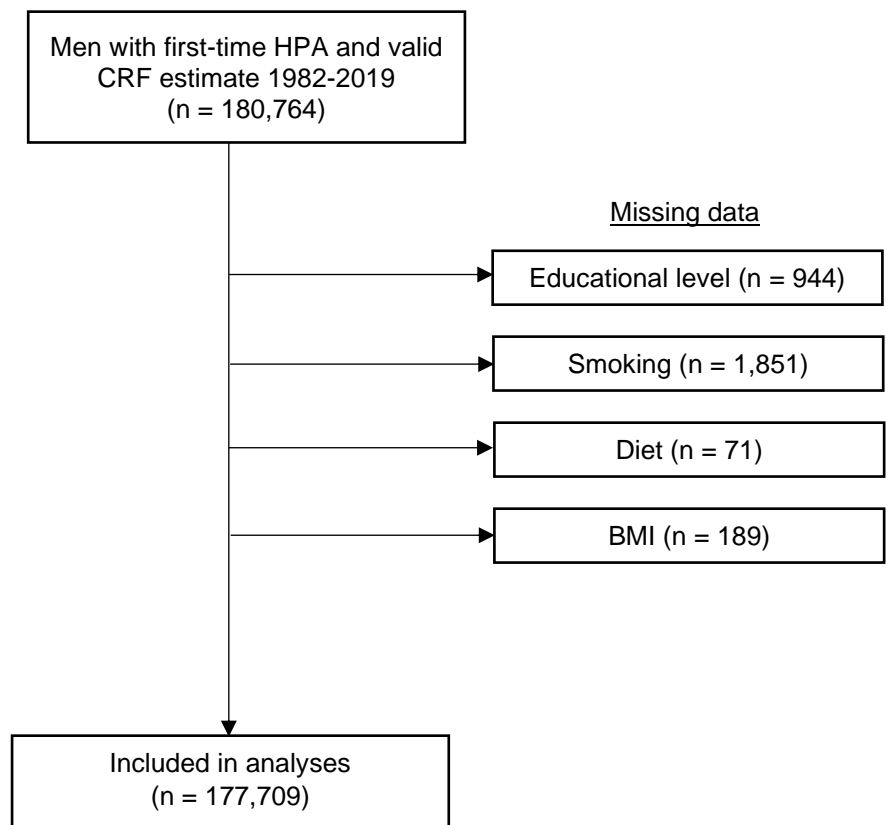

eFigure 2. **Flow chart of included and excluded participants**

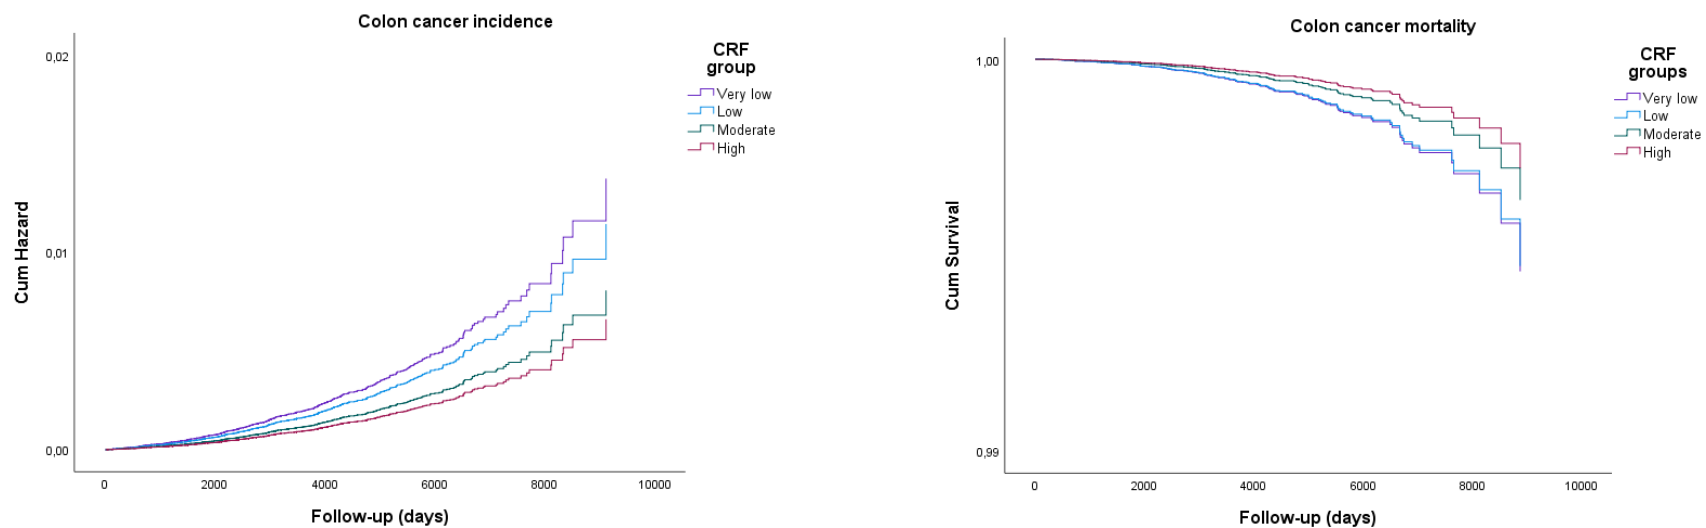

eFigure 3. **Cumulative colon cancer incidence and survival in relation to cardiorespiratory (CRF) group.** Very low CRF ( $\leq 25$  ml/min/kg), Low CRF ( $>25$ - $35$  ml/min/kg), Moderate CRF ( $>35$ - $45$  ml/min/kg), High CRF ( $>45$  ml/min/kg). Adjusted for year of HPA and age at HPA.

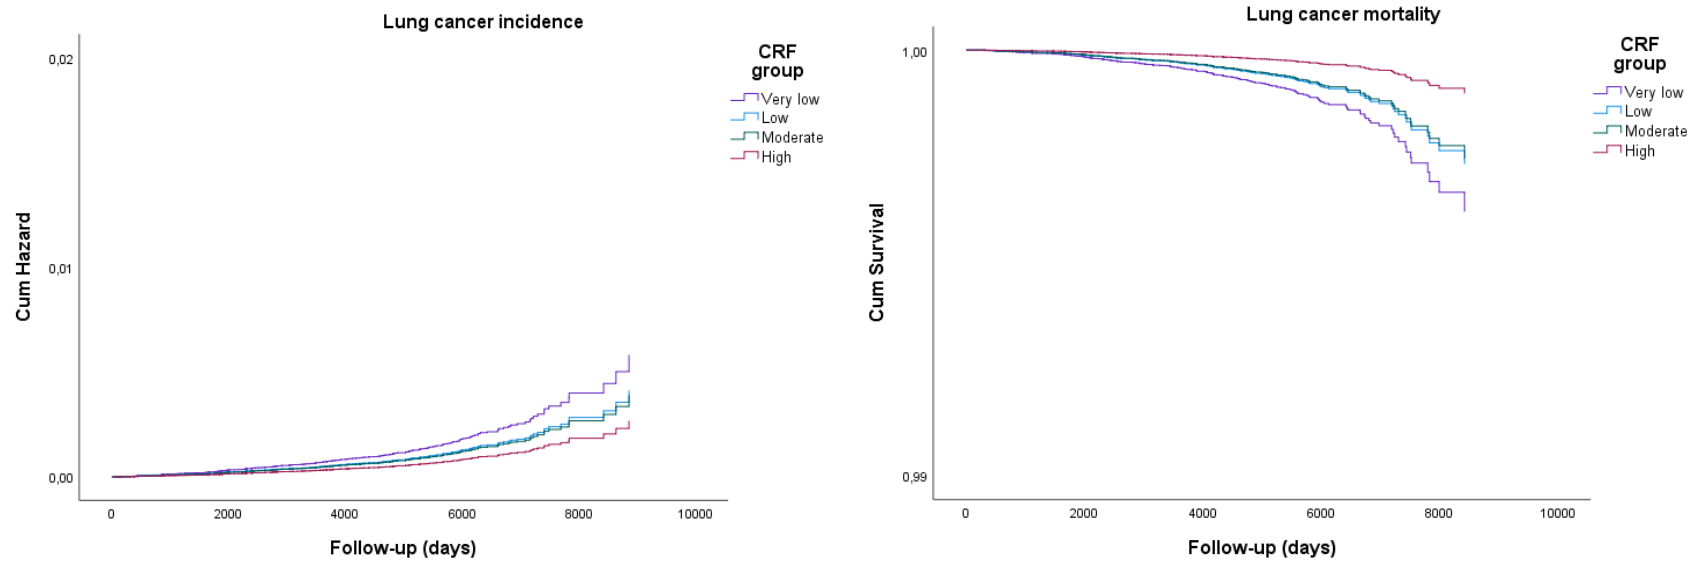

eFigure 4. **Cumulative lung cancer incidence and survival in relation to cardiorespiratory (CRF) group.** Very low CRF ( $\leq 25$  ml/min/kg), Low CRF ( $>25$ - $35$  ml/min/kg), Moderate CRF ( $>35$ - $45$  ml/min/kg), High CRF ( $>45$  ml/min/kg). Adjusted for year of HPA and age at HPA.

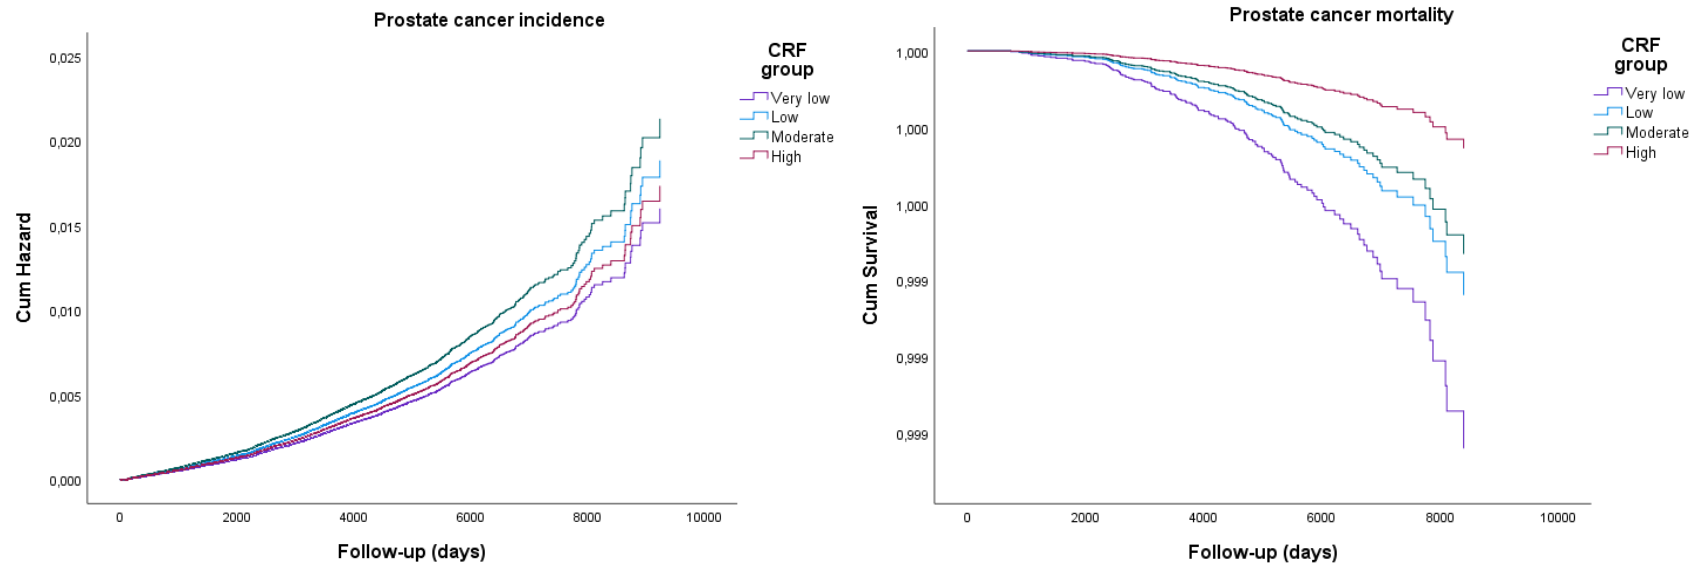

eFigure 5. **Cumulative prostate cancer incidence and survival in relation to cardiorespiratory (CRF) group.** Very low CRF ( $\leq 25$  ml/min/kg), Low CRF ( $>25$ - $35$  ml/min/kg), Moderate CRF ( $>35$ - $45$  ml/min/kg), High CRF ( $>45$  ml/min/kg). Adjusted for year of HPA and age at HPA.
